# Supplementary material for: A global daily mesoscale front dataset from satellite observations: In situ validation and cross-dataset comparison
Source: Copernicus journal article supplement (doi:10.5194/essd-2024-592), 2025-02-10
Supplement: Supplementary file 1 [file essd-2024-592-supplement.pdf]

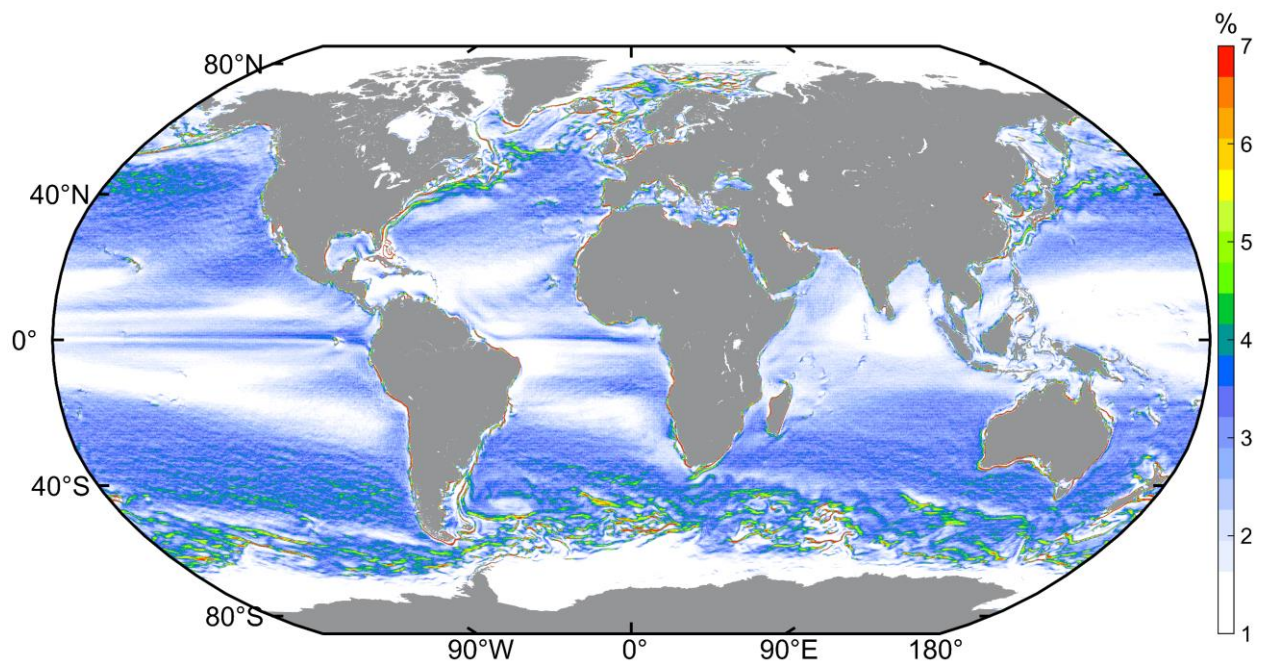

**Figure S1: Long-term frontal occurrence frequency from ESA SST (1982–2023) using the global front detection algorithm without random windows.**

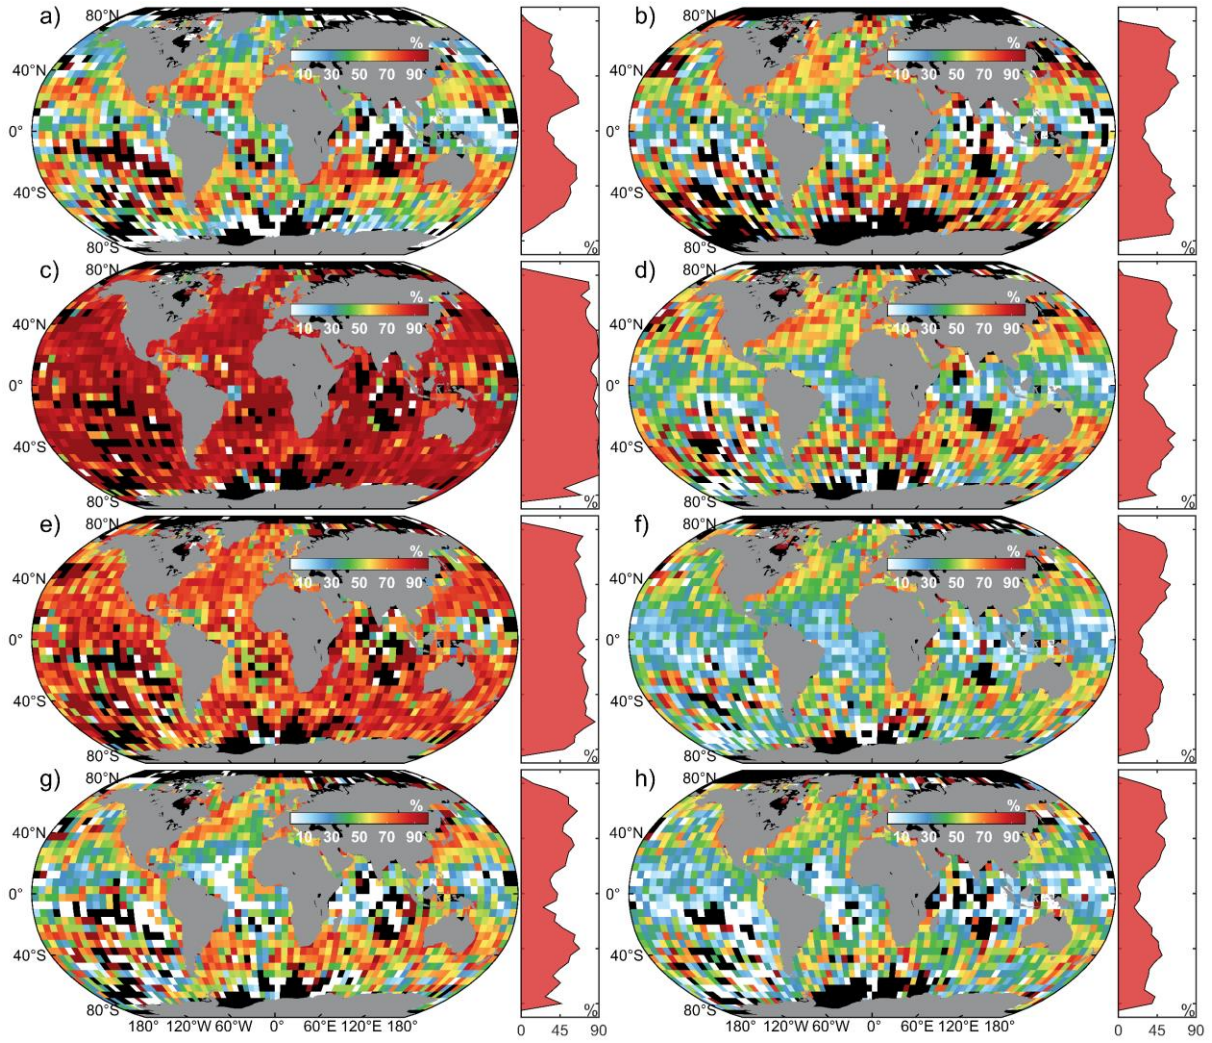

Figure S2: Statistical indicators of fronts derived from different datasets. a), c), e), and g) represent the hit rate for MODIS, REMSS, GLORYS, and HadGEM3-detected fronts, respectively, while (b), (d), (f), and (h) show their corresponding precision values.
