# Supplementary material for: A global daily mesoscale front dataset from satellite observations: In situ validation and cross-dataset comparison
Source: Copernicus journal article supplement (doi:10.5194/essd-2024-592), 2025-02-10
Supplement: Supplementary file [file essd-2024-592-AC2-supplement.pdf]

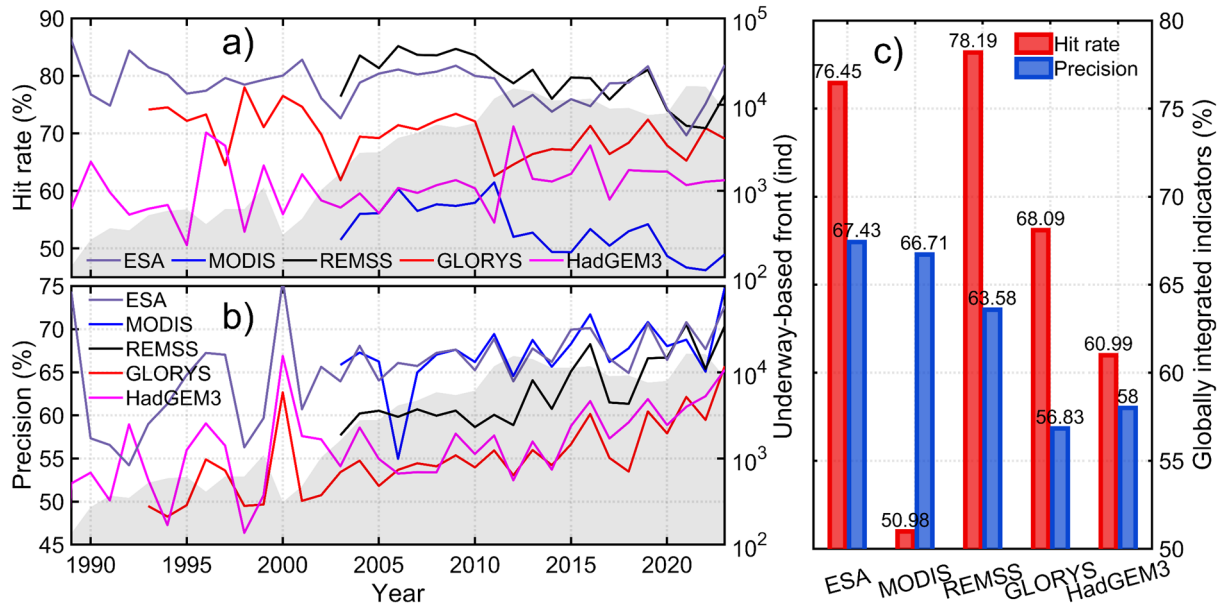

**Figure 7: Cross-datasets of frontal statistical indicators. a) and b) Hit rate (a) and precision (b) of fronts obtained from different datasets based on SUND-detected fronts. a) Globally integrated hit rate and precision based on SUND data.**

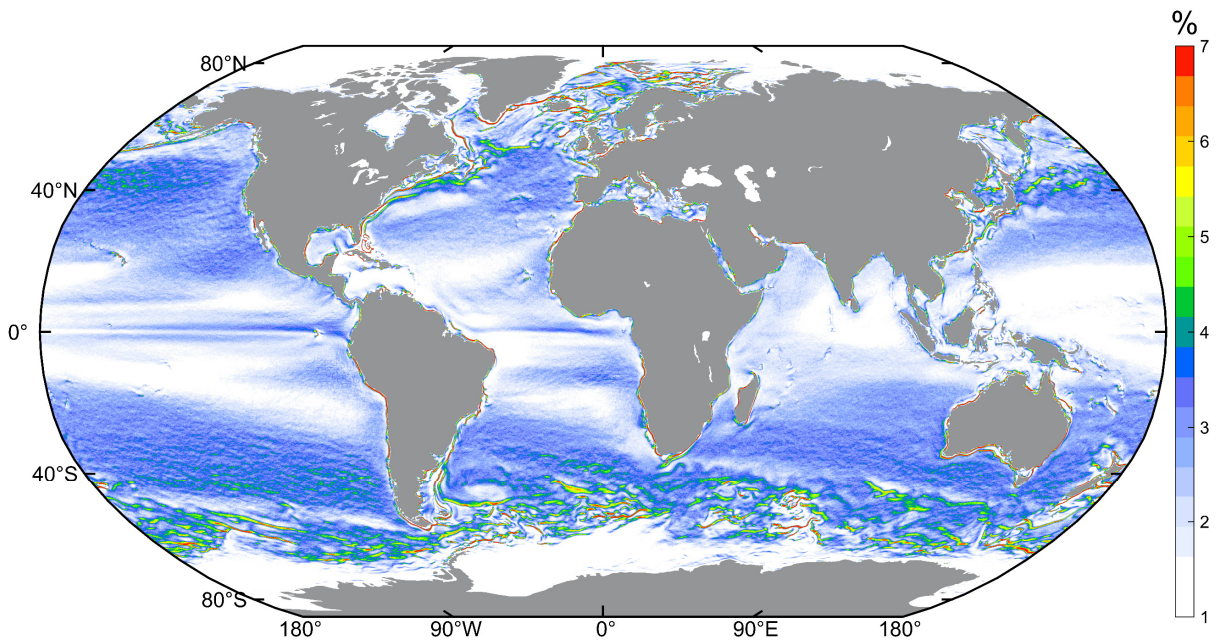

**Figure 8: Frontal occurrence frequency detected from ESA SST from 1982 to 2023.**
